# Supplementary material for: Elite Youth Soccer Players’ Sources and Types of Soccer Confidence
Source: MDPI journal article supplement (doi:10.3390/sports9110146), 2021-10-22

**Table S1.** Global dimensions and themes for types of confidence (numbers in parentheses illustrate the number of participants citing the source when >1).

| Raw Data Themes.               |   | Higher Order Themes |   | Global Dimension          |
|--------------------------------|---|---------------------|---|---------------------------|
| Winning                        | } | Outcome             | } | ACHIEVEMENT               |
| Scoring goals (3)              |   |                     |   |                           |
| Confidence to play well        |   |                     |   |                           |
| Passing (4)                    | } | Performance         | } |                           |
| Passing in the final third (1) |   |                     |   |                           |
|                                |   | Passing             | } |                           |
| Shooting (2)                   | } |                     |   |                           |
| Tackling (3)                   |   |                     |   |                           |
| Keeping possession             |   |                     |   |                           |
| Using both feet                |   |                     |   |                           |
| Body movement                  |   |                     |   |                           |
| Receiving the ball             |   | General Skills      |   |                           |
| Dribbling                      |   |                     |   |                           |
| Coming back from mistakes      |   |                     |   |                           |
| Attitude                       |   |                     |   | PSYCHOLOGICAL FACTORS     |
| Handling pressure              |   |                     |   |                           |
| Mentality                      |   |                     |   |                           |
| Beating other players          |   |                     |   | SUPERIORITY TO OPPOSITION |
| Playing against weaker teams   |   |                     |   |                           |
| Knowing opposition's play      |   |                     |   |                           |
| Good judgement                 |   |                     |   | TACTICAL AWARENESS        |
| Decision making                |   |                     |   |                           |
|                                |   |                     |   |                           |
| Communication                  |   |                     |   | ATHLETE SPECIFIC FACTORS  |
|                                |   |                     |   |                           |

**Table S2.** Themes and categories for sources of confidence identified by the academy youth athletes (numbers in parentheses illustrate the number of participants citing the source when >1).

| Raw Data Themes                                                                                                | Sub-Themes | Lower Order Themes | Higher Order Themes  | Global Dimensions |
|----------------------------------------------------------------------------------------------------------------|------------|--------------------|----------------------|-------------------|
| Good condition<br>Injury status (2)<br>Muscles feeling good (2)<br>Warming up properly (2)<br>Being rested (2) |            | Physical State     | Physical Preparation | PREPARATION       |
| Having your 5 a day<br>Eating breakfast<br>Eating well                                                         |            | Diet               |                      |                   |
| Looking good                                                                                                   |            | Self-presentation  |                      |                   |

Sports

2021

9,

146.

<https://doi.org/10.3390/sports9110146>

[www.mdpi.com/journal/sports](https://www.mdpi.com/journal/sports)

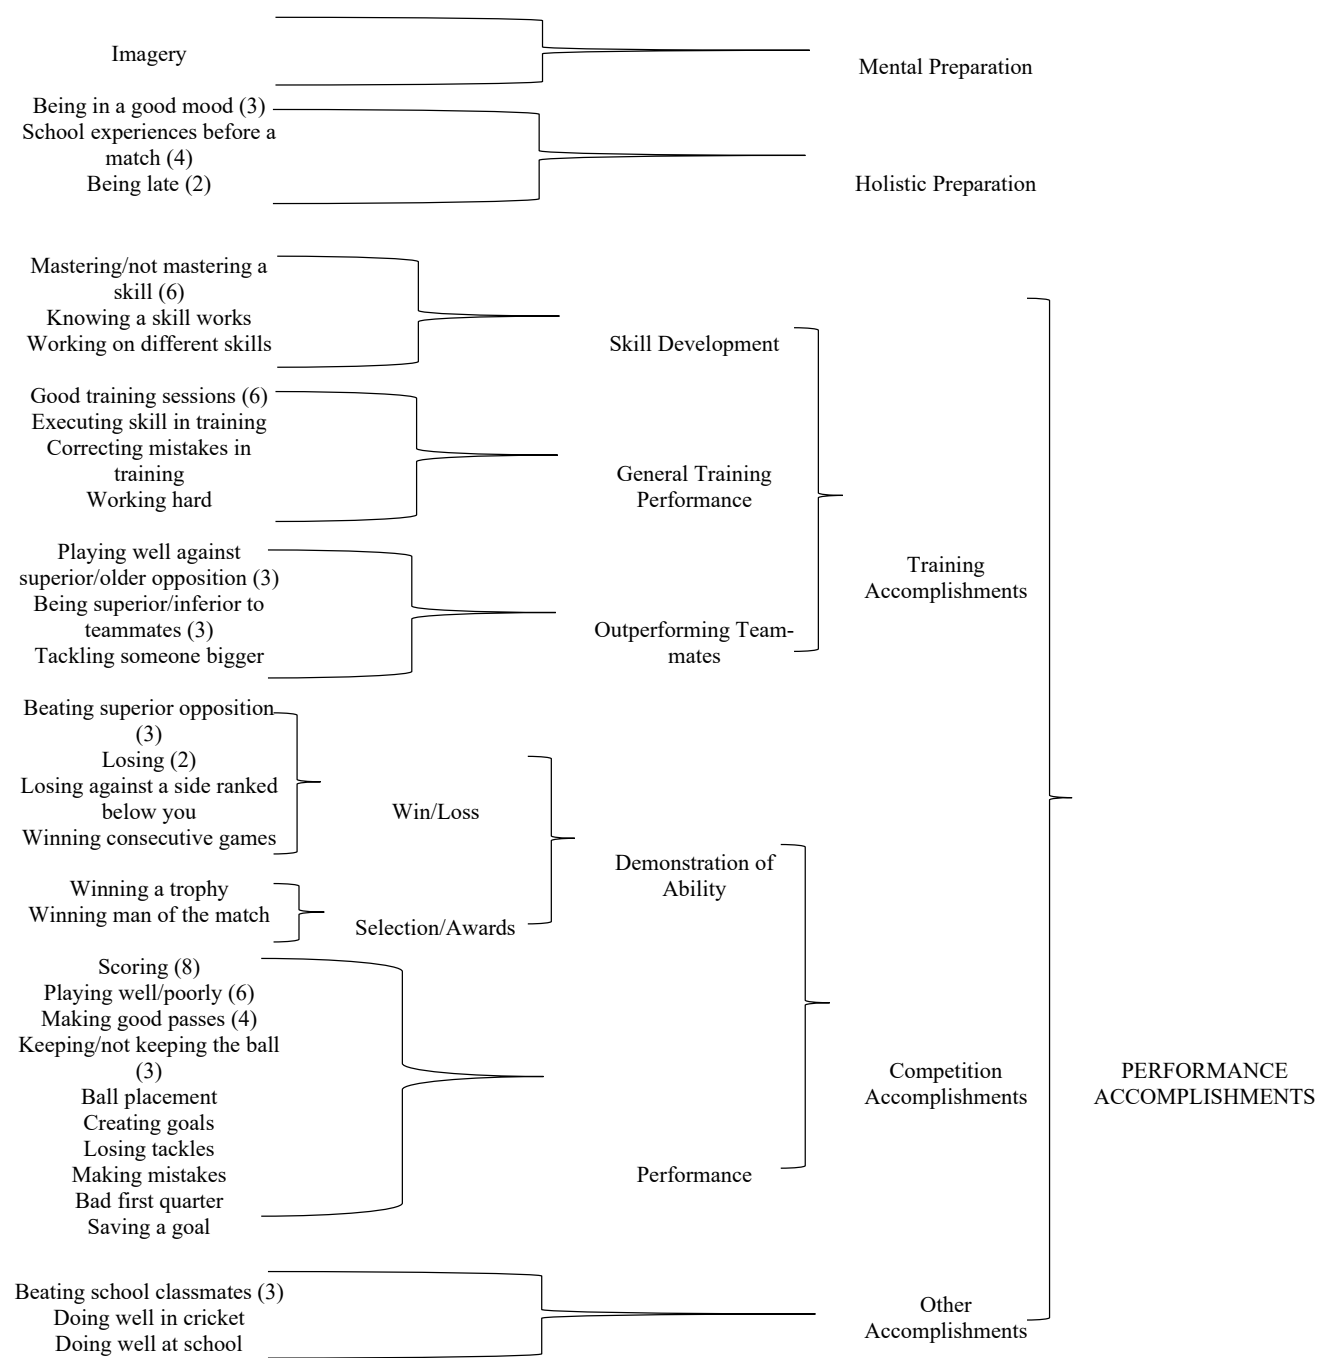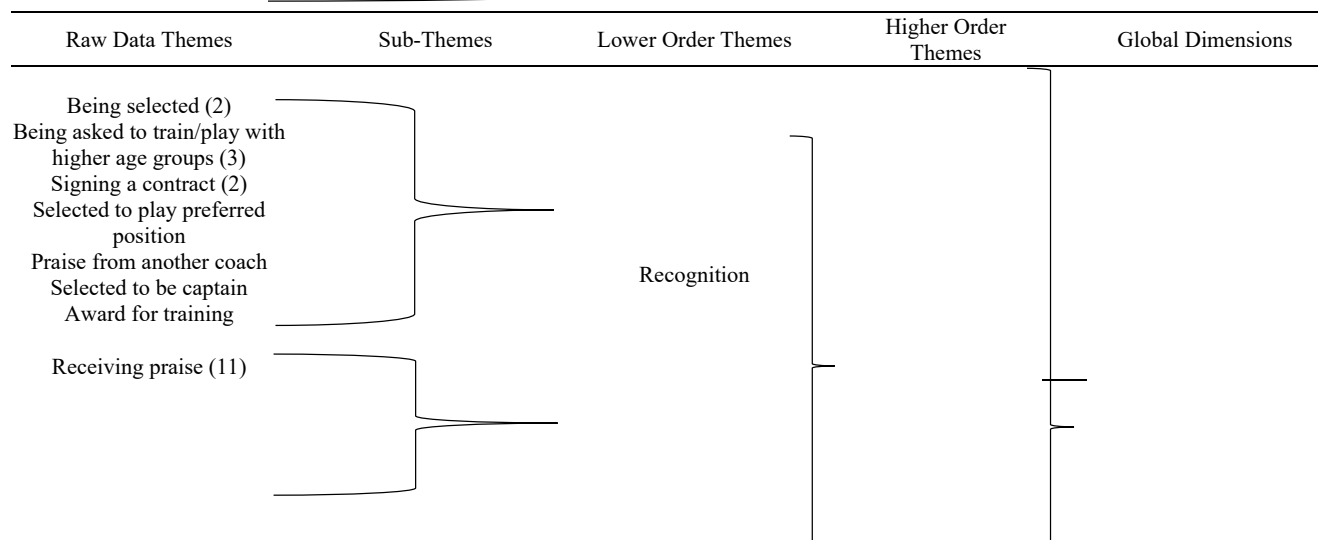

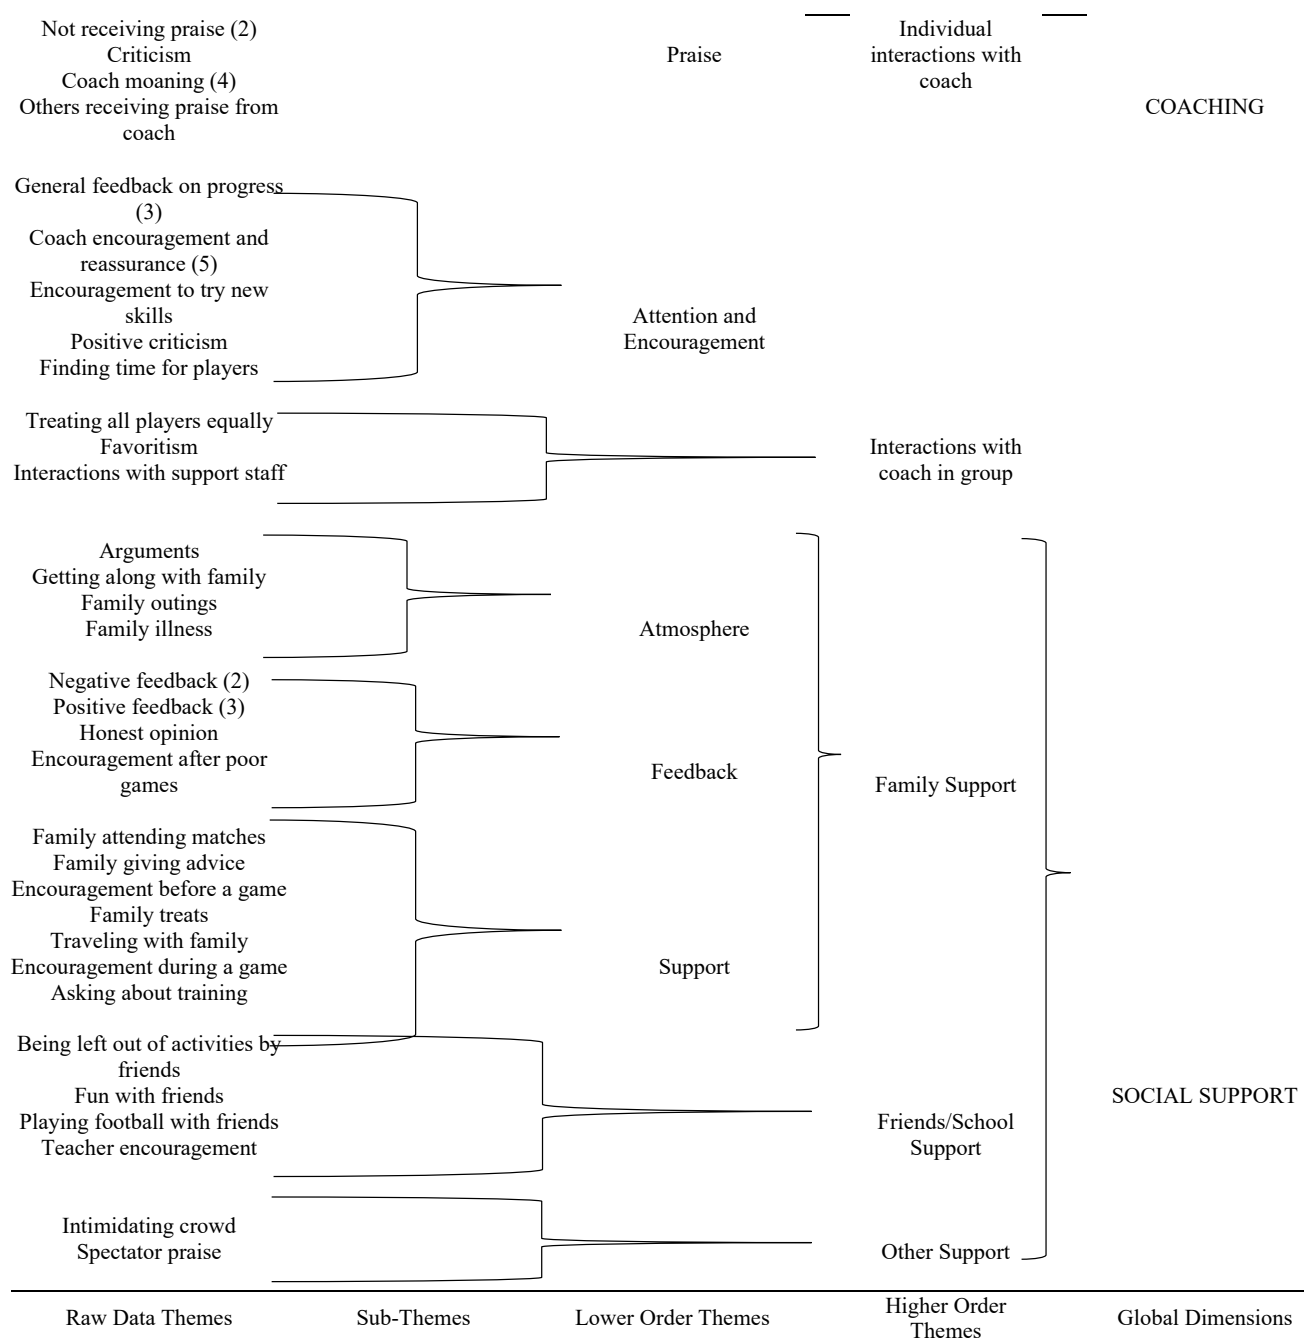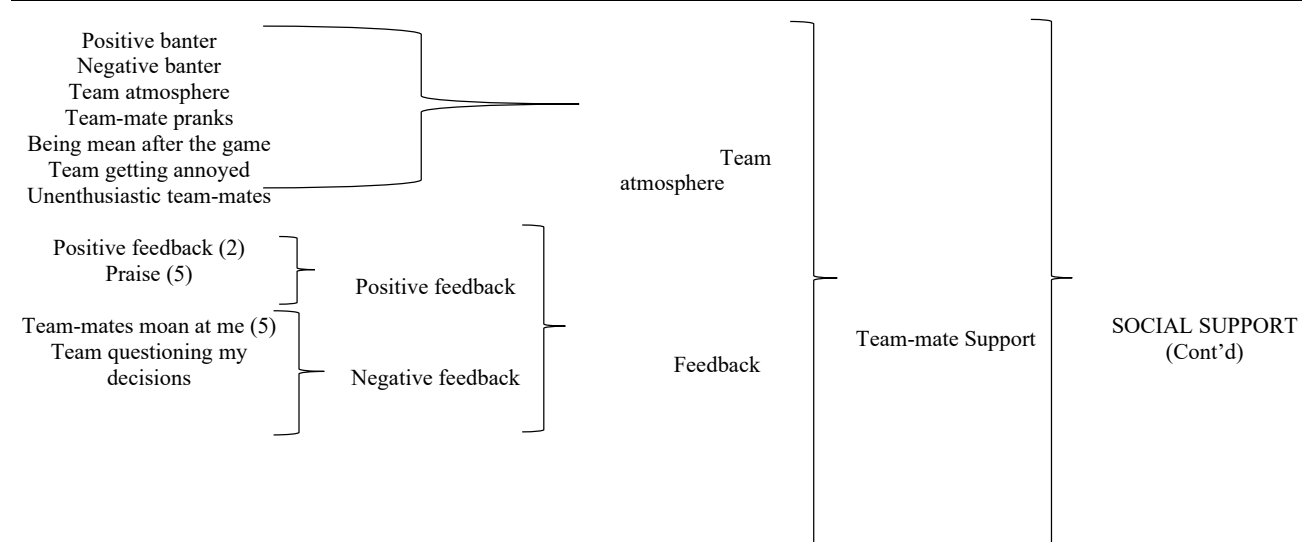

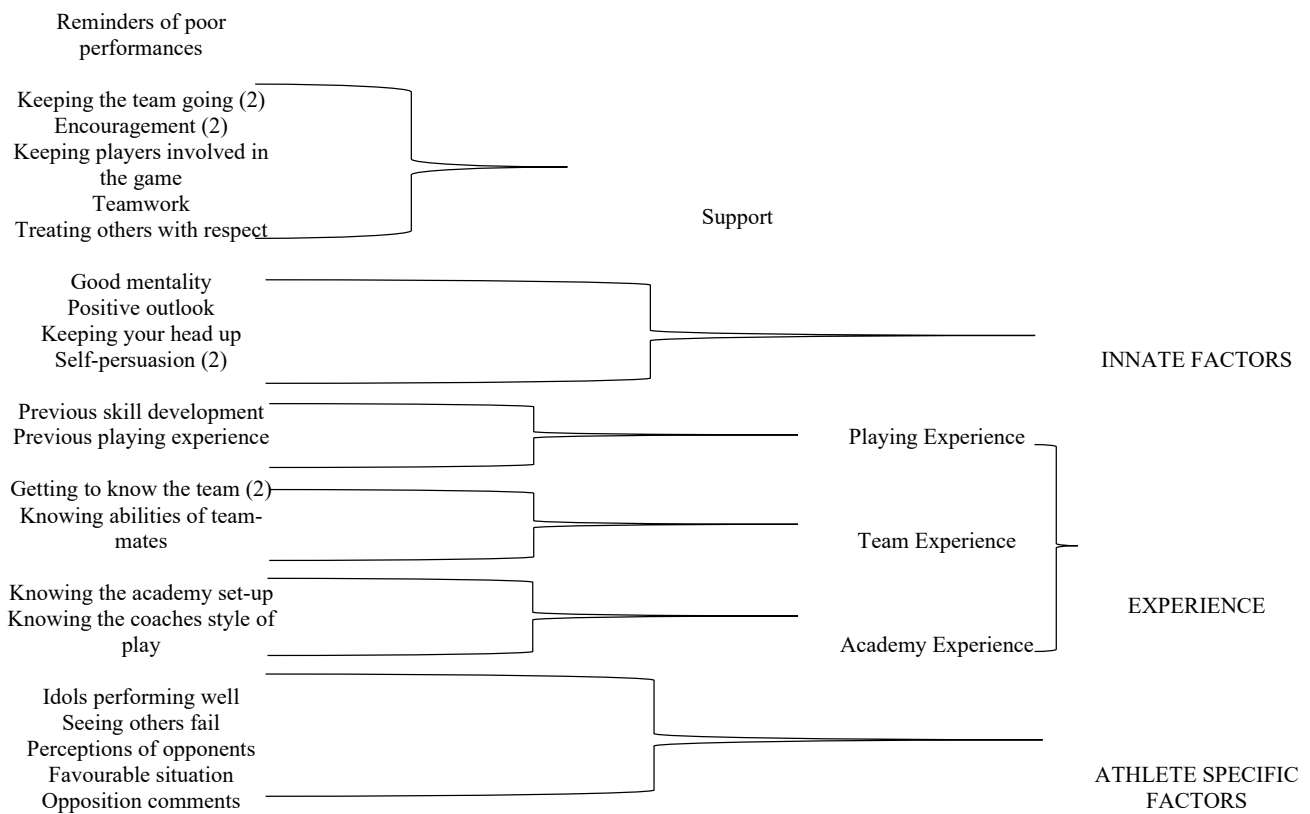

Supplement: s1 [file s1]
